# Supplementary material
Source: Royal Society of Chemistry journal article supplement (doi:10.1039/d6qi00454g)
Supplement: d6qi00454g1.pdf [file d6qi00454g1.pdf]

## Supplementary Information

### Ultrahigh Energy Storage Performance in (Bi,Na)TiO<sub>3</sub>-Based Relaxor Ferroelectrics via Multi-Scale High-Entropy Design

Xueqiong Lei<sup>a</sup>, Fan Zhang<sup>a,\*</sup>, Xin Wang<sup>b</sup>, Xiaoyue Ma<sup>a</sup>, Xinhui Li<sup>a</sup>, Chao Wang<sup>a</sup>, Tailong Che<sup>b</sup>, Changlong Li<sup>b</sup>, Zhan Jie Wang<sup>a</sup>

<sup>a</sup> School of Materials Science and Engineering, Shenyang University of Technology, Shenyang 110870, China

<sup>b</sup> Yingkou Magnesite Chemical Ind group Co., Ltd, Yingkou 115110, China

---

\*Corresponding author; E-mail: [zhangfan@sut.edu.cn](mailto:zhangfan@sut.edu.cn)

Table S1  $\Delta S_{\text{config}}$  of the ceramics.

| composition           | $\Delta S_{\text{config}}$ |
|-----------------------|----------------------------|
| BNBT                  | 0.879R                     |
| BNBT-SBT              | 1.204R                     |
| BNBT-SBT-<br>0.10BLNM | 1.713R                     |
| BNBT-SBT-<br>0.15BLNM | 1.902R                     |
| BNBT-SBT-<br>0.20BLNM | 1.998R                     |

Table S2 Riveted refinement parameters of the ceramics.

| Composition | Space group  | Weight         |  | Lattice parameters                          | $V/\text{\AA}^3$ | $R_{wp}/\%$ | $\lambda^2$ |
|-------------|--------------|----------------|--|---------------------------------------------|------------------|-------------|-------------|
|             |              | Fraction/<br>% |  |                                             |                  |             |             |
| BNBT        | $P4bm$       | 84.76          |  | $a=b=5.5316\text{\AA}, c=3.9257\text{\AA}$  | 120.121          | 8.70        | 1.24        |
|             | $R3c$        | 15.24          |  | $a=b=5.5155\text{\AA}, c=13.6084\text{\AA}$ | 358.511          |             |             |
| BNBT-SBT    | $P4bm$       | 89.83          |  | $a=b=5.5260\text{\AA}, c=3.9366\text{\AA}$  | 120.211          | 9.40        | 1.81        |
|             | $R3c$        | 10.17          |  | $a=b=5.4988\text{\AA}, c=13.5414\text{\AA}$ | 354.593          |             |             |
| BNBT-SBT-   | $Pm\bar{3}m$ | 97.74          |  | $a=b=c=3.8826\text{\AA}$                    | 58.529           | 8.39        | 1.67        |
| 0.10BLNM    | $Fd\bar{3}m$ | 2.26           |  | $a=b=c=10.3519\text{\AA}$                   | 1109.329         |             |             |
| BNBT-SBT-   | $Pm\bar{3}m$ | 95.87          |  | $a=b=c=3.8801\text{\AA}$                    | 58.416           | 7.62        | 1.49        |
| 0.15BLNM    | $Fd\bar{3}m$ | 4.13           |  | $a=b=c=10.3539\text{\AA}$                   | 1109.972         |             |             |
| BNBT-SBT-   | $Pm\bar{3}m$ | 94.22          |  | $a=b=c=3.8775\text{\AA}$                    | 58.298           | 9.12        | 1.53        |
| 0.20BLNM    | $Fd\bar{3}m$ | 5.78           |  | $a=b=c=10.3556\text{\AA}$                   | 1110.519         |             |             |

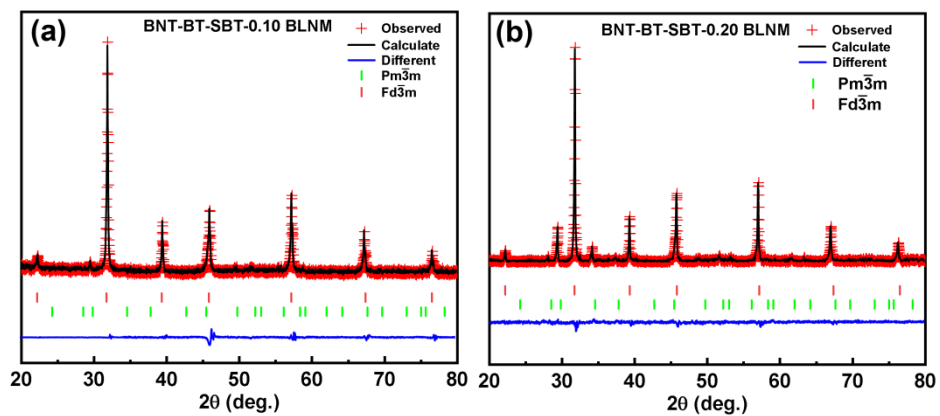

Fig. S1 XRD Rietveld refinements of the ceramics: (a) BNT-SBT-0.10BLNM, (b) BNT-SBT-0.20BLNM.

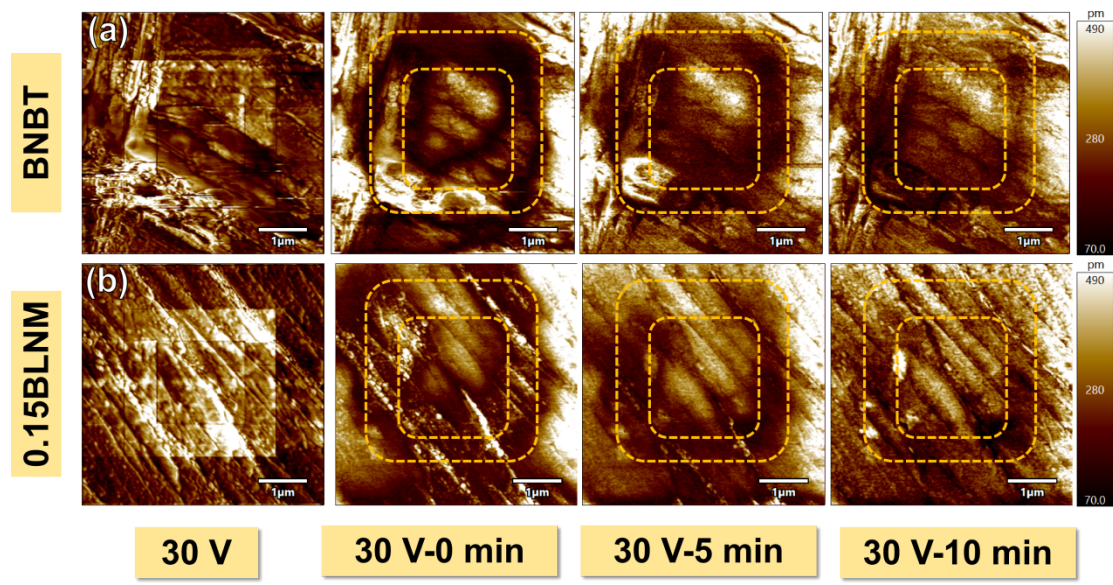

Fig. S2 PFM amplitude images for (a) BNBT and (b) BNBT-SBT-0.15BLNM.

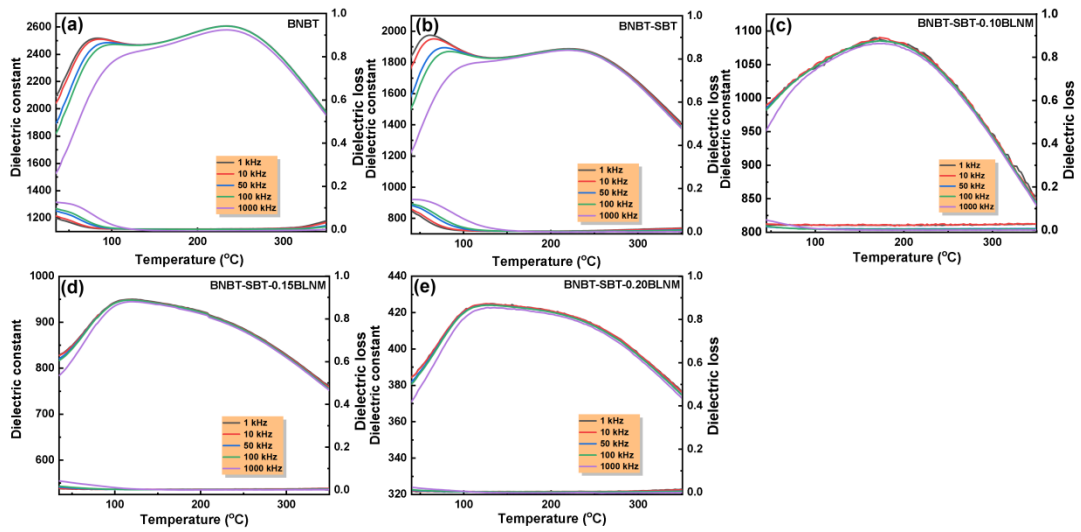

Fig. S3 Temperature-dependent dielectric constant and loss for the ceramics at 1-1000 kHz: (a) BNBT, (b) BNBT-SBT, (c) BNBT-SBT-0.10BLNM, (d) BNBT-SBT-0.15BLNM, (e) BNBT-SBT-0.20BLNM.

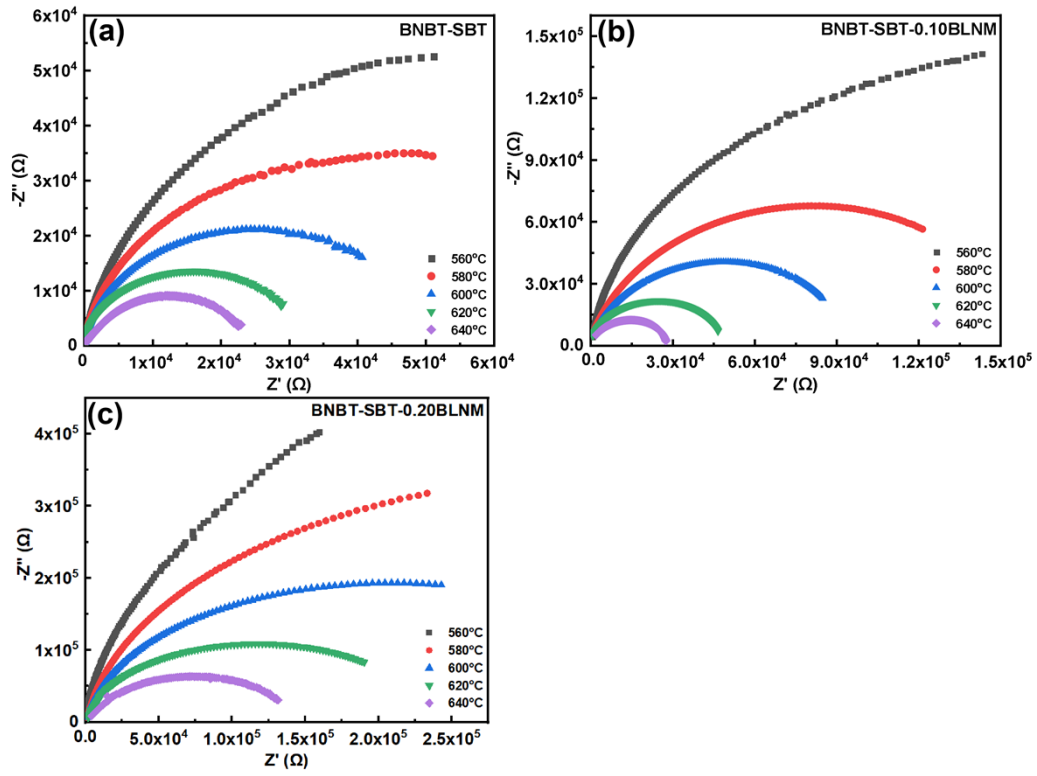

Fig. S4 Complex impedance spectra of the ceramics at 560-640 °C: (a) BNBT-SBT, (b) BNBT-SBT-0.10BLNM, (c) BNBT-SBT-0.20BLNM.

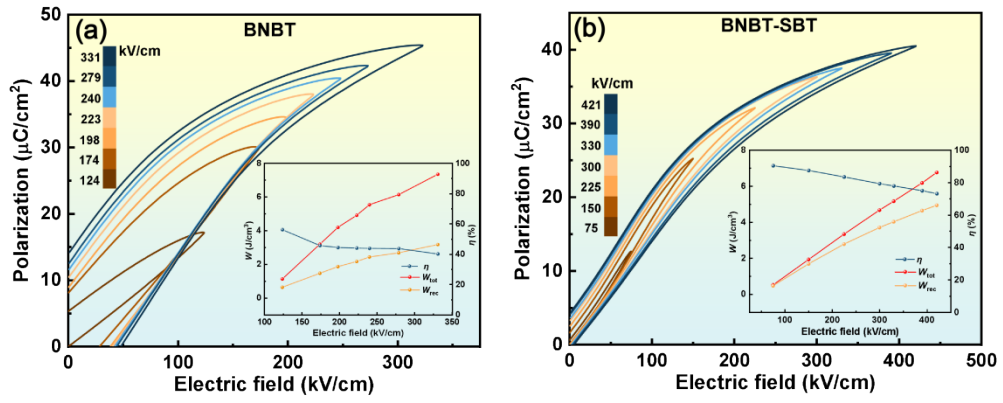

Fig. S5  $P$ - $E$  loops,  $W_{\text{rec}}$ , and  $\eta$  under various electric fields: (a) BNBT; (b) BNBT-SBT.
